# Supplementary material for: Furin inhibitor protects against neuronal cell death induced by activated NMDA receptors
Source: PubMed Central journal article supplement (PMC5980093; doi:10.1038/s41598-018-23567-0), 2018-03-26
Supplement: 41598_2018_23567_MOESM1_ESM.pdf [file 41598_2018_23567_MOESM1_ESM.pdf]

## **Supplementary Information**

### **Furin inhibitor protects against neuronal cell death induced by activated NMDA receptors**

Mariko Yamada, Hideki Hayashi, Moe Yuuki, Nahoko Matsushima, Bo Yuan, and Norio Takagi

Department of Applied Biochemistry, Tokyo University of Pharmacy and Life Sciences, 1432-1 Horinouchi, Hachioji, Tokyo 192-0392, Japan.

Address correspondence and reprint requests to Dr. Norio Takagi, Department of Applied Biochemistry, Tokyo University of Pharmacy and Life Sciences, 1432-1 Horinouchi, Hachioji, Tokyo 192-0392, Japan. e-mail: [takagino@toyaku.ac.jp](mailto:takagino@toyaku.ac.jp)

## **Supplemental materials and methods**

### **The direct effect of calpeptin and furin inhibitor on calpain activity.**

To examine direct effect of furin inhibitor on calpain activity *in vitro*, calpain-1 (Cat. No. 208713) were procured from Millipore (Billerica, MA, USA). The effects of calpeptin (calpain;  $K_i = 7$  nM) and furin inhibitor 1 (FI-1 : furin;  $K_i = 1$  nM) on activity of recombinant calpain were measured by performing the Calpain-Glo™ protease assay according to the manufacturer's instructions. Briefly, a volume of Calpain-Glo reagent equal to that of the indicated concentration of calpeptin or furin inhibitor in recombinant calpain (10 nM) was added. Then, they were incubated for 10 min at 37 °C. Luminescence was measured with a plate-reading luminometer, ARVO X2 (PerkinElmer, Waltham, MA, USA). The doses (10, 30, and 100 nM) used in this experiment were based on the  $K_i$  values for calpeptin and furin inhibitor 1 (FI-1).

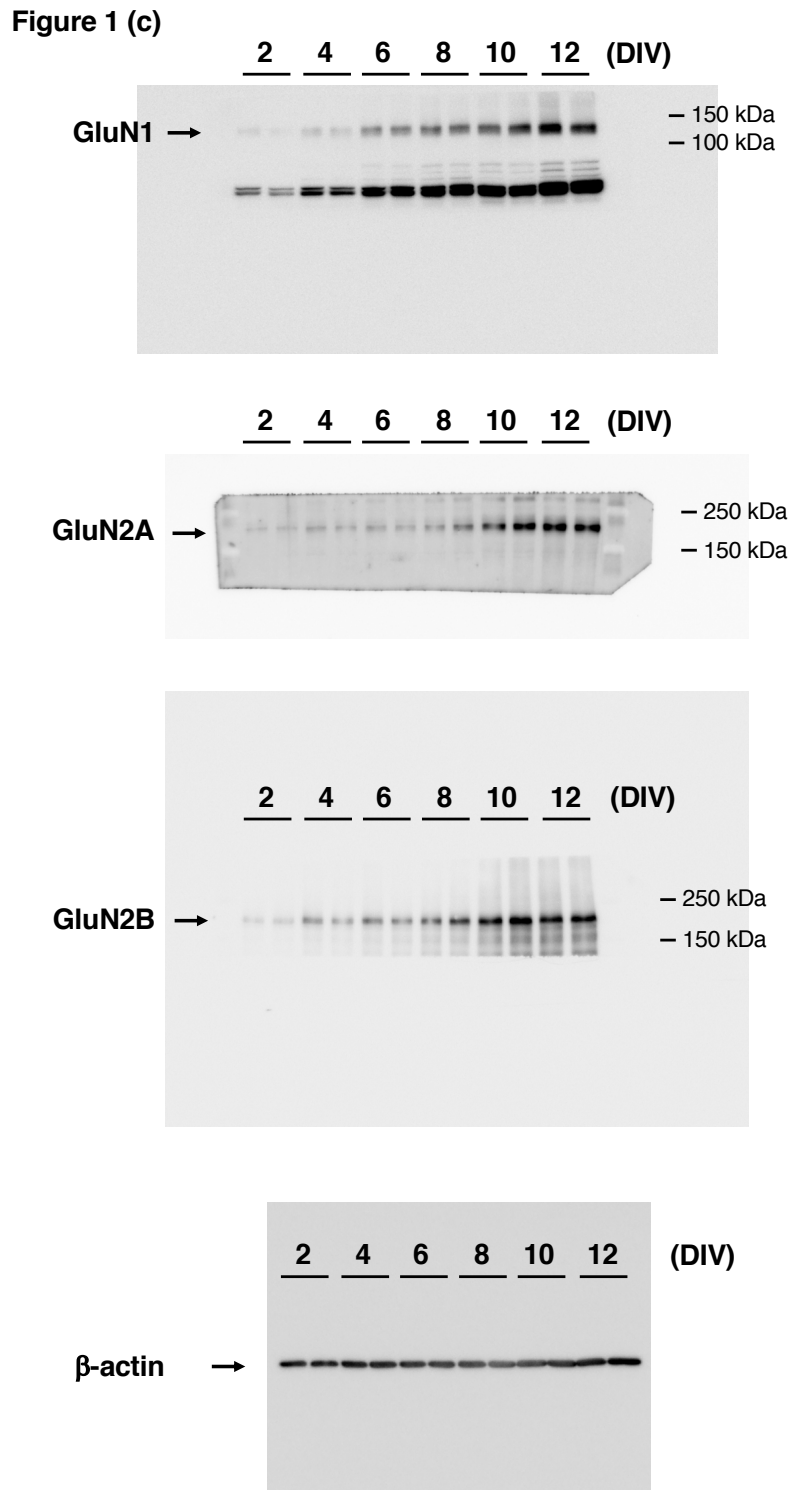

**Supplementary Figure S1.** Full-length blots corresponding to crop blots presented in the main manuscript

Full-length blots for Figure 1C (GluN1, GluN2A, GluN2B and actin). Area displayed in the main manuscript delineated by red rectangle.

Figure 5 (a)

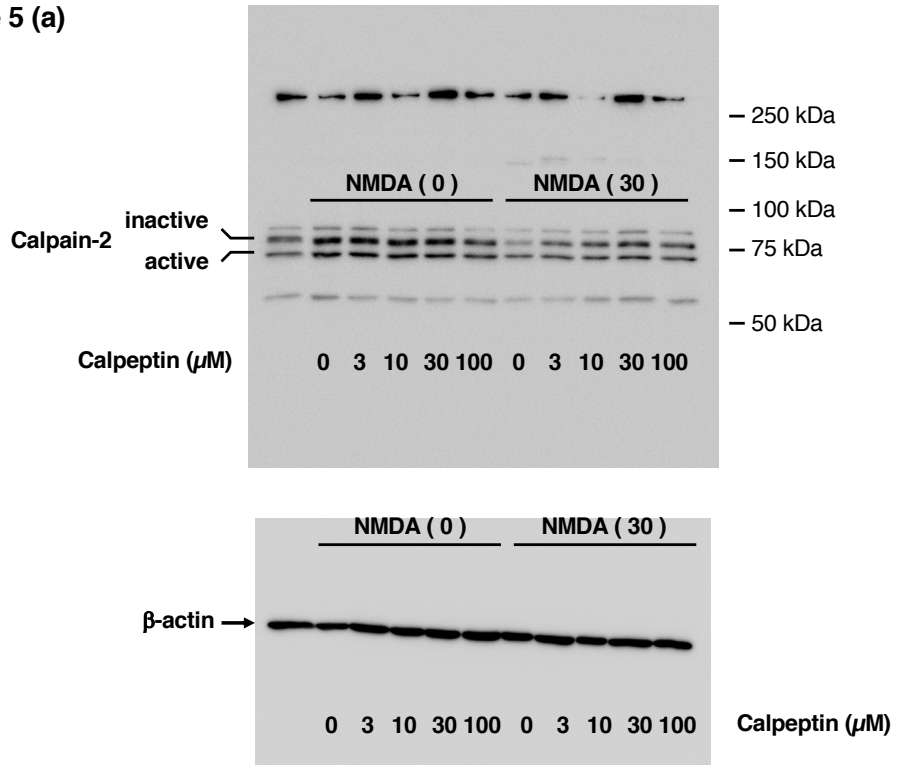

Figure 5 (b)

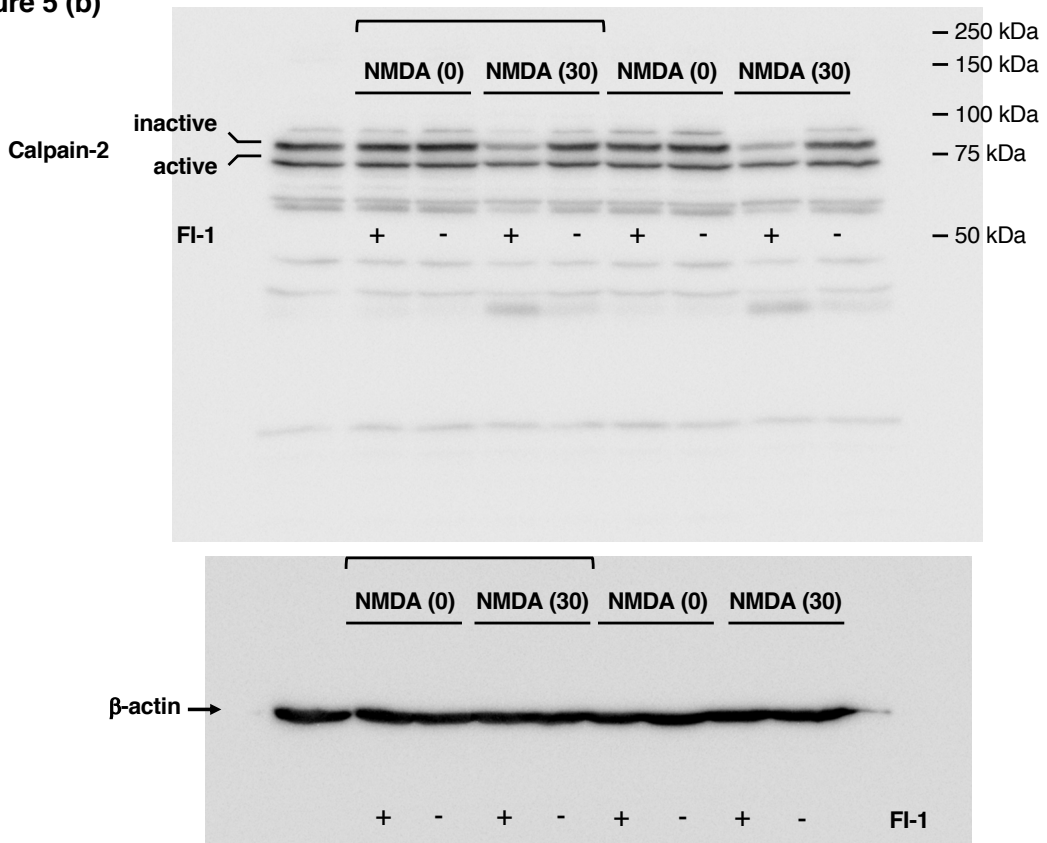

**Supplementary Figure S2.** Full-length blots corresponding to crop blots presented in the main manuscript.

Full-length blots for Figure 5A and 5B. Area displayed in the main manuscript delineated by red rectangle.

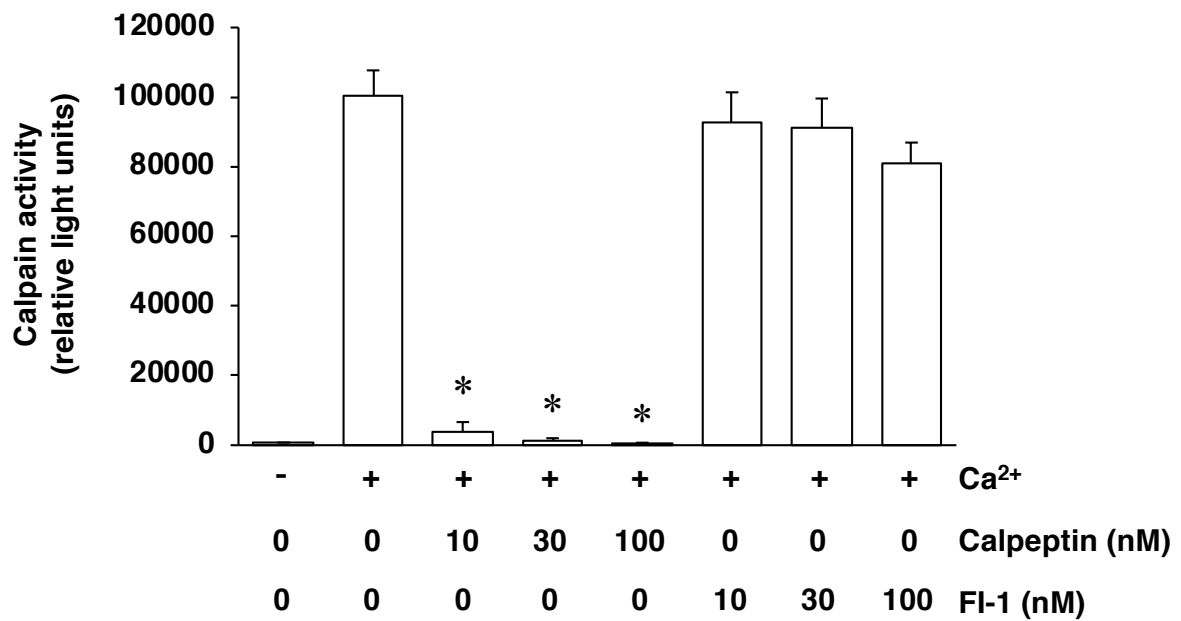

**Supplementary Figure S3.** The direct effect of calpeptin and FI-1 on the calpain activity. Direct effect of calpeptin and furin inhibitor 1 (FI1) on calpain activity in the presence of Ca<sup>2+</sup>. The activity of recombinant calpain treated with 0, 10, 30 and 100 nM calpeptin or furin inhibitor 1 is shown. Calpain activity was measured by performing the Calpain-Glo™ protease assay and expressed as the percentage of the inhibitor-untreated control group. Results are the means ± SE (n=3 independent experiments). \* indicates a significant difference from the inhibitor-untreated group (p < 0.05).
